# Supplementary material for: Single-Nucleotide Polymorphisms Associated with Mercury Levels and Neurological Symptoms: An Overview
Source: MDPI journal article supplement (doi:10.3390/toxics12030226), 2024-03-20
Supplement: s1 [file s1]

**Table S1.** Details of genes and SNPs studied in 13 included articles.

| Gene                       | Chr      | dnSNP ID   | Gene locus | SNP details              | Genotyping method                  | Minor allele | Frequency                  | References |
|----------------------------|----------|------------|------------|--------------------------|------------------------------------|--------------|----------------------------|------------|
| <i>ABCB1</i>               | 7q21.12  | rs1045642  | Exon 26    | 3435 A>G (Ile1145Ile)    | MassArray                          | G            | 48                         | [20]       |
| <i>ABCB1</i>               | 7q21.12  | rs17064    | 3'UTR      | 89 T>A                   | MassArray                          | A            | 6                          | [20]       |
| <i>ABCB1</i>               | 7q21.12  | rs3842     | 3'UTR      | 202 T>C                  | MassArray                          | C            | 2                          | [20]       |
| <i>ABCB1</i>               | 7q21.12  | rs9282564  | Exon 2     | 61 T>C (Asn21Asp)        | MassArray                          | C            | 6                          | [20]       |
| <i>ABCC1</i>               | 16p13.11 | rs212090   | 3'UTR      | 543 T>A                  | MassArray                          | A            | 20                         | [24]       |
| <i>ABCC1</i>               | 16p13.11 | rs2230671  | Exon 28    | 4002 G>A (Ser1334Ser)    | MassArray                          | A            | 24                         | [20]       |
| <i>ABCC1</i>               | 16p13.11 | rs8187858  | Exon 13    | 1704 C>T (Tyr568Tyr)     | MassArray                          | T            | 8                          | [20]       |
| <i>ABCC2</i>               | 10q24.2  | rs17222723 | Exon 25    | 3563 T>A (Val1188Glu)    | MassArray                          | A            | 5                          | [20]       |
| <i>ABCC2</i>               | 10q24.2  | rs1885301  | 5'UTR      | -1549 A>G                | MassArray                          | G            | 15                         | [24]       |
| <i>ABCC2</i>               | 10q24.2  | rs2273697  | Exon 10    | 1249 G>A (Val417Ile)     | MassArray                          | A            | 17                         | [20]       |
| <i>ABCC2</i>               | 10q24.2  | rs3740066  | Exon 28    | 3972 C>T (Ile1324Ile)    | MassArray                          | T            | 15                         | [24]       |
| <i>ABCC2</i>               | 10q24.2  | rs8187710  | Exon 32    | 4544G>A (Cys1515Tyr)     | MassArray                          | A            | 5                          | [20]       |
| <i>ABCC4</i>               | 13q32.1  | rs868853   | Promoter   | -1508 T>C                | MassArray                          | C            | 1                          | [20]       |
| <i>ABCG2</i>               | 4q22.1   | rs2231142  | Exon 5     | 421 G>T (Glu141Lys)      | MassArray                          | T            | 15                         | [20]       |
| <i>AHCY</i>                | 20q11.22 | rs819146   | 5'UTR      | -124 T>G                 | MassArray                          | G            | 15                         | [20]       |
| <i>ALAD</i>                | 9q32     | rs1800435  | Exon 4     | 177 C>G (Lys59Asn)       | TaqMan                             | G            | 1 and 3                    | [5,18]     |
| <i>ATP7B</i>               | 13q14.3  | rs1061472  | Exon 10    | 2495 C>T (Lys832Arg)     | MassArray                          | T            | 27 and 48                  | [20,24]    |
| <i>ATP7B</i>               | 13q14.3  | rs1801243  | Exon 2     | 1216 A>C (Ser406Ala)     | MassArray                          | C            | 27 and 48                  | [20,24]    |
| <i>ATP7B</i>               | 13q14.3  | rs732774   | Exon 12    | 2855 T>C (Arg952Lys)     | MassArray                          | C            | 47                         | [20]       |
| <i>BCL11A</i> <sup>a</sup> | 2p16.1   | rs4671393  | Intron 2   | G>A                      | MassArray                          | A            | 2                          | [20]       |
| <i>BDNF</i> <sup>a</sup>   | 11p14.1  | rs6265     | Exon 11    | 196 C>T (Val66Met)       | MassArray                          | T            | 29                         | [20]       |
| <i>CAT</i> <sup>a</sup>    | 11p13    | rs7943316  | Promoter   | -21 A>T                  | MassArray                          | T            | 10 and 43                  | [24,20]    |
| <i>CBS</i>                 | 21q22.3  | rs1051319  | 3'UTR      | 123 C>G                  | MassArray                          | G            | 7                          | [20]       |
| <i>CBS</i>                 | 21q22.3  | rs2850146  | Promoter   | -8283 C>G                | MassArray                          | G            | 8                          | [20]       |
| <i>CPOX</i>                | 3q11.2   | rs1131857  | Exon 4     | 814 T>G (Asn272His)      | MassArray                          | G            | 18                         | [20]       |
| <i>CYP2D6</i>              | 22q13.2  | rs1080985  | Promoter   | -1584 G>C                | MassArray                          | C            | 27                         | [24]       |
| <i>CYP3A4</i>              | 7q22.1   | rs2740574  | Promoter   | -392T>C                  | TaqMan and Microarray <sup>b</sup> | C            | 1-54 (range) <sup>f</sup>  | [22]       |
| <i>CYP3A5</i>              | 7q22.1   | rs776746   | Exon 14    | 6986 C>T (Splice Defect) | TaqMan and Microarray <sup>b</sup> | T            | 6-55 (range) <sup>f</sup>  | [22]       |
| <i>CYP3A7</i>              | 7q22.1   | rs2257401  | Exon 11    | 26041 G>C (Thr409Arg)    | TaqMan                             | C            | 46-92 (range) <sup>f</sup> | [22]       |
| <i>DNMT1</i>               | 19p13.2  | rs2228613  | Exon       | 1632 G>T (Ile544Ile)     | MassArray                          | T            | 6                          | [20]       |
| <i>FADS2</i>               | 11q12.2  | rs174602   | Intron     | T>C (Asp6Asp)            | MassArray                          | C            | 18                         | [24]       |
| <i>FADS2</i>               | 11q12.2  | rs74771917 | Intron     | C>T                      | MassArray                          | T            | 27                         | [24]       |
| <i>FADS3</i>               | 11q12.2  | rs7115739  | Intron     | 1287-380 G>T             | MassArray                          | T            | 27                         | [24]       |
| <i>GCLC</i>                | 6p12.1   | rs17883901 | Promoter   | -129G>A                  | TaqMan and MassArray <sup>c</sup>  | A            | 8 <sup>g</sup>             | [18,23,20] |

|                           |          |            |            |                          |                                   |   |                                                              |                  |
|---------------------------|----------|------------|------------|--------------------------|-----------------------------------|---|--------------------------------------------------------------|------------------|
| <i>GCLM</i>               | 6p12.1   | rs41303970 | Promoter   | -588 G>A                 | TaqMan                            | A | 12 and 30                                                    | [15,23]          |
| <i>GGTLC1</i>             | 20p11.21 | rs395485   | Exon 8     | C>T                      | MassArray                         | T | 32                                                           | [20]             |
| <i>GLRX2</i> <sup>a</sup> | 1q31.2   | rs912071   | 5'UTR      | T>C                      | MassArray                         | C | 37                                                           | [20]             |
| <i>GPX1</i>               | 3p21.3   | rs1050450  | Exon 2     | 559G>A (Pro198Leu)       | TaqMan                            | A | 3 and 25                                                     | [23,19]          |
| <i>GPX1</i>               | 3p21.3   | rs1800668  | 5'UTR      | +2G>A                    | TaqMan                            | A | -                                                            | [18]             |
| <i>GPX4</i>               | 19p13.3  | rs713041   | 3'UTR      | 718 C>T                  | MassArray                         | T | 11                                                           | [24]             |
| <i>GPX6</i>               | 6p22.1   | rs6413428  | Exon 5     | 710 A>G                  | MassArray                         | G | 18                                                           | [20]             |
| <i>GPX7</i>               | 1p32.3   | rs1970951  | Exon 2     | 237 C>T (Phe79Phe)       | MassArray                         | T | 17                                                           | [20]             |
| <i>GSS</i>                | 20q11.22 | rs3761144  | 5'UTR      | -4420G>C                 | MassArray                         | C | 42                                                           | [20]             |
| <i>GSS</i>                | 20q11.22 | rs725521   | 3'UTR      | 559C>T                   | MassArray                         | T | 42                                                           | [20]             |
| <i>GSTA2</i>              | 6p12.2   | rs2180314  | Exon 5     | 63G>C (Ser112Thr)        | MassArray                         | C | 4                                                            | [20]             |
| <i>GSTA4</i>              | 6p12.2   | rs367836   | 3'UTR      | +137 T>G                 | MassArray                         | G | 34                                                           | [20]             |
| <i>GSTA4</i>              | 6p12.2   | rs405729   | 3'UTR      | 668 C>T                  | MassArray                         | T | 35 and 39                                                    | [24,20]          |
| <i>GSTM1</i>              | 1p13.3   | rs1065411  | Exon 7     | 2697 G>C (Lys173Asn)     | MassArray                         | C | 17                                                           | [20]             |
| <i>GSTM3</i>              | 1p13.3   | rs1332018  | Promoter   | -63 T>G                  | MassArray                         | G | 34                                                           | [20]             |
| <i>GSTM3</i>              | 1p13.3   | rs7483     | Exon 7     | C>T (Val224Ile)          | MassArray                         | T | 43                                                           | [20]             |
| <i>GSTO1</i>              | 10q25.1  | rs4925     | Exon 4     | 419 C>A (Ala140Asp)      | MassArray                         | A | 27                                                           | [20]             |
| <i>GSTO2</i>              | 10q25.1  | rs156697   | Exon 5     | 424 A>G (Asn142Asp)      | MassArray                         | G | 36                                                           | [20]             |
| <i>GSTP1</i>              | 11p13.2  | rs1138272  | Exon 6     | 341 C > T (Ala114Val)    | MassArray                         | T | 6                                                            | [20]             |
| <i>GSTP1</i>              | 11p13.2  | rs1695     | Exon 5     | 313 A>G (Ile105Val)      | TaqMan and MassArray <sup>c</sup> | G | 18-47 (range) <sup>h</sup>                                   | [15,18,23,20,25] |
| <i>HBS1L</i>              | 6q23.3   | rs4895441  | Intergenic | A>G                      | MassArray                         | G | 26                                                           | [20]             |
| <i>HMOX1</i> <sup>a</sup> | 22q12.3  | rs2071747  | Exon 1     | 19 G>C (Asp7His)         | MassArray                         | C | 5                                                            | [20]             |
| <i>MDR1</i>               | 38.p14   | rs2032582  | Exon 1     | 2677 C>A (Ala893Ser/Thr) | TaqMan                            | A | 47                                                           | [18]             |
| <i>MT1A</i>               | 16q13    | rs11076161 | Intron 1   | G>A                      | MassArray                         | A | 32                                                           | [20]             |
| <i>MT1A</i>               | 16q13    | rs8052394  | Exon       | 152 A>G (Lys51Arg)       | PCR-RFLP                          | G | 22                                                           | [26]             |
| <i>MT1B</i>               | 16q13    | rs7191779  | Exon       | -1975 C>G                | MassArray                         | G | 48                                                           | [20]             |
| <i>MT1B</i>               | 16q13    | rs8052334  | Promoter   | 95-68 T>C                | MassArray                         | C | 48                                                           | [20]             |
| <i>MT1B</i>               | 16q13    | rs964372   | Intron 1   | G>C                      | MassArray                         | C | 18                                                           | [20]             |
| <i>MT1E</i>               | 38.p14   | rs7403881  | 5'UTR      | G>C                      | MassArray                         | C | 46                                                           | [20]             |
| <i>MT1M</i>               | 16q13    | rs2270836  | Intron 2   | 95-49 C>T                | TaqMan and MassArray <sup>c</sup> | T | 22 and 35                                                    | [23,20]          |
| <i>MT1M</i>               | 16q13    | rs2270837  | 3'UTR      | A>G                      | TaqMan                            | G | 17-18 <sup>i</sup> (range) / 24 <sup>i</sup>                 | [16]             |
| <i>MT1M</i>               | 16q13    | rs9936741  | Intron 2   | 31 T>C                   | TaqMan                            | C | 13                                                           | [23]             |
| <i>MT2A</i>               | 16q13    | rs10636    | 3'UTR      | +838 G>C                 | TaqMan and MassArray <sup>c</sup> | C | 23-25 <sup>i</sup> / 23-25 <sup>i</sup> (range) <sup>k</sup> | [23,20,16]       |
| <i>MT3</i>                | 16q13    | rs11644094 | Intron     | A>G                      | MassArray                         | G | 32                                                           | [20]             |
| <i>MT4</i>                | 16q13    | rs11643815 | 3'UTR      | G>A Gly48Asp             | TaqMan and MassArray <sup>c</sup> | A | 0.6 and 9                                                    | [23,20]          |
| <i>MTF1</i>               | 1p34.3   | rs12751325 | Intron     | T>C                      | MassArray                         | C | 28                                                           | [20]             |

|                          |          |            |          |                      |                                                                     |   |           |         |
|--------------------------|----------|------------|----------|----------------------|---------------------------------------------------------------------|---|-----------|---------|
| <i>MTF1</i>              | 1p34.3   | rs473279   | Exon     | C>T                  | MassArray                                                           | T | 13        | [24]    |
| <i>MTF1</i>              | 1p34.3   | rs9660548  | 5'UTR    | 8298155 T>A          | MassArray                                                           | A | 42        | [24]    |
| <i>MTHFR</i>             | 1p36.22  | rs1801133  | Exon 11  | 677 G>A (Ala222Val)  | MassArray                                                           | A | 14        | [24]    |
| <i>MTHFR</i>             | 1p36.22  | rs2274976  | Exon 11  | 1793 C>T (Arg594Gln) | MassArray                                                           | T | 9 and 49  | [20,24] |
| <i>MTR</i>               | 1q43     | rs1805087  | Exon 26  | 2756 A>G (Asp919Gly) | MassArray                                                           | G | 15        | [20]    |
| <i>MTRR</i>              | 1p36.22  | rs1801131  | Exon 4   | 1298 T>G (Gln429Ala) | MassArray                                                           | G | 46        | [24]    |
| <i>MTRR</i>              | 5p15.31  | rs1801394  | Exon 7   | 66 G>A (Ile22Met)    | MassArray                                                           | A | 27 and 47 | [24,20] |
| <i>MTRR</i>              | 5p15.31  | rs3776467  | Intron   | 7068 A>G             | MassArray                                                           | G | 37        | [20]    |
| <i>NOS1<sup>a</sup></i>  | 12q24.22 | rs2682826  | Exon 2   | 151745 G>A           | MassArray                                                           | A | 27        | [20]    |
| <i>PON1</i>              | 7q21.3   | rs662      | 3'UTR    | 192 T>C (Gln192Arg)  | Spectrophotometer <sup>d</sup> and MassArray or TaqMan <sup>e</sup> | C | 37 and 56 | [21,17] |
| <i>PON1</i>              | 7q21.3   | rs705379   | Exon 6   | -108 G>A             | MassArray or TaqMan <sup>e</sup>                                    | A | 37        | [17]    |
| <i>PON1</i>              | 7q21.3   | rs705381   | Promoter | -162 C>T             | MassArray or TaqMan <sup>e</sup>                                    | T | 12        | [17]    |
| <i>PON1</i>              | 7q21.3   | rs854560   | Promoter | 163 T>A (Leu54Met)   | MassArray or TaqMan <sup>e</sup>                                    | A | 18        | [17]    |
| <i>PON1</i>              | 7q21.3   | rs854571   | Promoter | -832 C>T             | MassArray or TaqMan <sup>e</sup>                                    | T | 41        | [17]    |
| <i>PON1</i>              | 7q21.3   | rs854572   | Exon 3   | -909 C>G             | MassArray or TaqMan <sup>e</sup>                                    | G | 39        | [17]    |
| <i>PRDX2<sup>a</sup></i> | 19p13.13 | rs10427027 | 3'UTR    | T>C                  | MassArray                                                           | C | 11        | [20]    |
| <i>PRDX2<sup>a</sup></i> | 19p13.13 | rs12151144 | Intron   | A>C                  | MassArray                                                           | C | 11        | [20]    |
| <i>PRDX6<sup>a</sup></i> | 1q25.1   | rs33942654 | Promoter | G>A                  | MassArray                                                           | A | 23        | [20]    |
| <i>SCL22A8</i>           | 11q12.3  | rs4149182  | Intron   | 437+79C>G            | MassArray                                                           | G | 23        | [20]    |
| <i>SELS</i>              | 15q26.3  | rs7178239  | 5'UTR    | C>G                  | MassArray                                                           | G | 22        | [20]    |
| <i>SEPHS2</i>            | 16p11.2  | rs1133238  | 3'UTR    | G>A                  | MassArray                                                           | A | 8         | [20]    |
| <i>SEPN1</i>             | 1p36.11  | rs2294228  | Exon 4   | 1506A>C (Asn502Lys)  | MassArray                                                           | C | 17        | [20]    |
| <i>SEPN1</i>             | 1p36.11  | rs7349185  | 3'UTR    | 425A>G (Tyr142Cys)   | MassArray                                                           | G | 15        | [20]    |
| <i>SEPP1</i>             | 1p36.11  | rs3877899  | Exon 5   | 700 C>T (Ala234Ser)  | MassArray                                                           | T | 18        | [20]    |
| <i>SEPP1</i>             | 5p12     | rs7579     | Exon     | 25191 C>T            | MassArray                                                           | T | 28        | [20]    |
| <i>SLC11A1</i>           | 2q25     | rs1059823  | 3'UTR    | 577 A>G              | MassArray                                                           | G | 38        | [20]    |
| <i>SLC11A1</i>           | 2q25     | rs3731865  | Intron 4 | 469+14G>C            | MassArray                                                           | C | 22        | [20]    |
| <i>SLC22A6</i>           | 11q12.3  | rs4149170  | 3'UTR    | 453 C>T              | MassArray                                                           | T | 11        | [20]    |
| <i>SLC22A8</i>           | 11q12.3  | rs4149182  | Intron   | C>G                  | MassArray                                                           | G | 23        | [20]    |
| <i>SLC3A2</i>            | 11q12.3  | rs2269353  | 5'UTR    | G>A                  | MassArray                                                           | A | 8         | [20]    |
| <i>SLC43A2</i>           | 17p13.3  | rs4790732  | 5'UTR    | G>C                  | MassArray                                                           | C | 34 and 49 | [20,24] |
| <i>SLC7A2</i>            | 8p22     | rs62622371 | Exon     | G>A                  | MassArray                                                           | A | 7         | [20]    |
| <i>SLC7A5</i>            | 16q24.2  | rs33916661 | 5'UTR    | A>G                  | MassArray                                                           | G | 2         | [20]    |
| <i>SLC7A7</i>            | 14q11.2  | rs2281677  | Intron   | -86 G>A              | MassArray                                                           | A | 37        | [20]    |
| <i>SLC7A8</i>            | 14q11.2  | rs8011016  | Intron   | T>C                  | MassArray                                                           | C | 14        | [20]    |
| <i>SLCO1B1</i>           | 12p12.1  | rs2306283  | Intron   | 388 A>G (Asn130Asp)  | MassArray                                                           | G | 34        | [24]    |

|                            |          |            |         |                       |           |   |    |      |
|----------------------------|----------|------------|---------|-----------------------|-----------|---|----|------|
| <i>TET1</i>                | 10q21.3  | rs10823229 | Exon    | A>G (Asp162Gly)       | MassArray | G | 39 | [20] |
| <i>TET1</i>                | 10q21.3  | rs3998860  | Exon    | 3369 G>A (Ile1123Met) | MassArray | A | 16 | [20] |
| <i>TET2</i>                | 4q24     | rs34402524 | Exon 11 | 5162T>G (Leu1721Trp)  | MassArray | G | 11 | [20] |
| <i>TXNRD2</i> <sup>a</sup> | 22q11.21 | rs5748469  | Exon 4  | 196 C>A (Ala66Ser)    | MassArray | A | 49 | [20] |
| <i>TXNRD2</i> <sup>a</sup> | 22q11.21 | rs5992495  | Exon    | 865 T>G (Ser299Arg)   | MassArray | G | 16 | [20] |
| <i>TXNRD3</i> <sup>a</sup> | 3q21.3   | rs3108755  | Exon 3  | G>A                   | MassArray | A | 5  | [20] |
| <i>VDR</i> <sup>a</sup>    | 12q13.11 | rs1544410  | 5'UTR   | 63980 C>T (BsmI)      | TaqMan    | T | 32 | [18] |

(-) no information; Chr = Chromosome; UTR = untranslated region; MassArray = Sequenom iPLEX Gold platform; TaqMan = Real-Time PCR; <sup>a</sup>Genes in toxicodynamic pathway of mercury; <sup>b</sup>Genotyping of rs776746 and rs2740574 in INMA cohort was performed by Microarray technology (Illumine Human Omni1-Quad BeadChip platform); <sup>c</sup>Parajuli et al., [20] 2016 used MassArray technology; <sup>d</sup>Lopes et al., [21] 2017 used EnSpire spectrophotometer microplate reader platform; <sup>e</sup>The authors did not discriminate which technology was used for each SNP. <sup>f</sup>Five cohorts were studied in this study: NC1-Seychelles (54.1, 54.5 and 44.8%), NC2-Seychelles (54.0, 55.1 and 46.5%), INMA-Spain (3.5, 7.8 and 90.5%), PHIME-Italy (3.2, 5.7 and 92.2%) and PHIME-Greece (1.4, 5.9 and 87.6%). <sup>g</sup>Barcelos et al., 2015 combined the heterozygous and variant homozygous genotypes for some SNPs, making it not possible to extract the variant allele frequency. <sup>h</sup>Barcelos et al., 2013 [15] and 2015 (43%) [18], Chan et al., [23] (18%), Parajuli 2016 [20] (et al., (33%), and Rahbar et al., [25] (47%). <sup>i</sup>Range of boys at Entry (Baseline) and in Year 2 and Year 7 of study. <sup>j</sup>Range of girls at Entry (Baseline) and in Year 2 and Year 7 of study; <sup>k</sup>Chan et al., and Parajuli et al., 2016 presented 22% and 25% of the variant allele, respectively.
